# Supplementary material
Source: PubMed Central journal article supplement (PMC5613819)
Supplement: PEDS_20170988SupplementaryData.pdf [file PEDS_20170988SupplementaryData.pdf]

# Supplemental Information

**SUPPLEMENTAL TABLE 5** Baseline Characteristics of Not Missing Versus Missing Bayley-III Outcomes  
(Among Children With at Least 1 Valid Neurodevelopmental Assessment)  
in the Tshipidi Study, Botswana 2010–2012

|                        | Not Missing, <i>N</i> (%) | Missing, <i>N</i> (%) | <i>P</i> ( $\chi^2$ ) |
|------------------------|---------------------------|-----------------------|-----------------------|
| Bayley-III cognitive   | 658                       | 66                    | —                     |
| HIV exposure status    |                           |                       | .34                   |
| HIV-exposed            | 310 (47.1%)               | 27 (40.9%)            |                       |
| Sex                    |                           |                       | .37                   |
| Female                 | 337 (51.2%)               | 30 (45.5%)            |                       |
| Birth weight           |                           |                       | .51                   |
| Low birth weight       | 82 (12.5%)                | 10 (15.4%)            |                       |
| Breastfed              |                           |                       | .57                   |
| Ever breastfed         | 283 (43.0%)               | 26 (39.3%)            |                       |
| Prematurity (<37 wk)   |                           |                       | <.01                  |
| Premature              | 73 (11.5%)                | 16 (25.0%)            |                       |
| Maternal age           |                           |                       | .22                   |
| 18–24                  | 265 (40.3%)               | 28 (42.4%)            |                       |
| 25–29                  | 157 (23.9%)               | 20 (30.3%)            |                       |
| 30–34                  | 122 (18.6%)               | 11 (16.7%)            |                       |
| 35–39                  | 94 (14.3%)                | 6 (9.1%)              |                       |
| 40–44                  | 19 (2.9%)                 | 1 (1.5%)              |                       |
| Maternal education     |                           |                       | .67                   |
| None                   | 10 (1.5%)                 | 0 (0%)                |                       |
| Primary                | 56 (8.5%)                 | 4 (6.3%)              |                       |
| Secondary junior       | 330 (50.2%)               | 32 (50.0%)            |                       |
| Secondary senior       | 262 (39.8%)               | 28 (43.8%)            |                       |
| Maternal income        |                           |                       | .91                   |
| None                   | 426 (64.8%)               | 40 (61.5%)            |                       |
| <P500                  | 34 (5.2%)                 | 3 (4.6%)              |                       |
| P501–P1000             | 87 (13.2%)                | 9 (13.9%)             |                       |
| >P1000                 | 110 (16.7%)               | 13 (20.0%)            |                       |
| Access to sanitation   |                           |                       | .31                   |
| Indoor                 | 138 (21.1%)               | 17 (26.2%)            |                       |
| Private                | 443 (67.7%)               | 38 (58.5%)            |                       |
| Shared                 | 73 (11.2%)                | 10 (15.4%)            |                       |
| Access to electricity  |                           |                       | .44                   |
| Yes                    | 372 (56.5%)               | 40 (61.5%)            |                       |
| Access to water        |                           |                       | .43                   |
| Home                   | 124 (18.8%)               | 19 (29.2%)            |                       |
| Yard                   | 455 (69.2%)               | 40 (61.5%)            |                       |
| Communal               | 68 (10.3%)                | 6 (9.2%)              |                       |
| Other                  | 11 (1.8%)                 | 0 (0%)                |                       |
| Cooking method         |                           |                       | .03                   |
| Gas, electric          | 478 (72.6%)               | 47 (72.3%)            |                       |
| Wood                   | 5 (0.8%)                  | 3 (4.6%)              |                       |
| Kerosene               | 166 (25.2%)               | 15 (23.1%)            |                       |
| None                   | 9 (1.4%)                  | 0 (0%)                |                       |
| Housing type           |                           |                       | .67                   |
| Formal                 | 650 (98.8%)               | 65 (100%)             |                       |
| Informal               | 6 (0.9%)                  | —                     |                       |
| None                   | 2 (0.3%)                  | —                     |                       |
| Bayley-III gross motor | 642                       | 82                    | —                     |
| HIV exposure status    |                           |                       | .09                   |
| HIV-exposed            | 306 (47.7%)               | 31 (37.8%)            |                       |
| Sex                    |                           |                       | .55                   |
| Female                 | 328 (51.1%)               | 39 (47.6%)            |                       |
| Birth weight           |                           |                       | .20                   |
| Low birth weight       | 78 (12.2%)                | 14 (17.3%)            |                       |
| Breastfed              |                           |                       | .24                   |
| Ever breastfed         | 279 (43.5%)               | 30 (36.6%)            |                       |
| Prematurity (<37 wk)   |                           |                       | .04                   |
| Premature              | 73 (11.8%)                | 16 (19.8%)            |                       |
| Maternal age           |                           |                       | .22                   |
| 18–24                  | 256 (39.9%)               | 37 (45.1%)            |                       |

TABLE 5 Continued

|                       | Not Missing, <i>N</i> (%) | Missing, <i>N</i> (%) | <i>P</i> ( $\chi^2$ ) |
|-----------------------|---------------------------|-----------------------|-----------------------|
| 25–29                 | 155 (24.2%)               | 22 (26.8%)            |                       |
| 30–34                 | 121 (18.9%)               | 12 (14.6%)            |                       |
| 35–39                 | 91 (14.2%)                | 9 (11.0%)             |                       |
| 40–44                 | 18 (2.8%)                 | 2 (2.4%)              |                       |
| Maternal education    |                           |                       | .19                   |
| None                  | 9 (1.4%)                  | 1 (1.2%)              |                       |
| Primary               | 56 (8.7%)                 | 4 (4.9%)              |                       |
| Secondary junior      | 323 (50.4%)               | 39 (48.2%)            |                       |
| Secondary senior      | 253 (39.5%)               | 37 (45.7%)            |                       |
| Maternal income       |                           |                       | .67                   |
| None                  | 409 (63.8%)               | 57 (70.4%)            |                       |
| <P500                 | 33 (5.2%)                 | 4 (4.9%)              |                       |
| P501–P1000            | 88 (13.7%)                | 8 (9.9%)              |                       |
| >P1000                | 111 (17.3%)               | 12 (14.8%)            |                       |
| Access to sanitation  |                           |                       | .95                   |
| Indoor                | 137 (21.5%)               | 18 (22.2%)            |                       |
| Private               | 428 (67.1%)               | 53 (65.4%)            |                       |
| Shared                | 73 (11.4%)                | 10 (12.4%)            |                       |
| Access to electricity |                           |                       | .50                   |
| Yes                   | 363 (56.5%)               | 49 (60.5%)            |                       |
| Access to water       |                           |                       | .67                   |
| Home                  | 123 (19.2%)               | 20 (24.7%)            |                       |
| Yard                  | 440 (68.5%)               | 55 (67.9%)            |                       |
| Communal              | 68 (10.6%)                | 6 (7.4%)              |                       |
| Other                 | 11 (1.8%)                 | 0 (0%)                |                       |
| Cooking method        |                           |                       | .07                   |
| Gas, electric         | 469 (73.1%)               | 56 (69.1%)            |                       |
| Wood                  | 159 (24.8%)               | 22 (27.2%)            |                       |
| Kerosene              | 5 (0.8%)                  | 3 (3.7%)              |                       |
| None                  | 9 (1.4%)                  | 0 (0%)                |                       |
| Housing type          |                           |                       | .60                   |
| Formal                | 634 (98.8%)               | 81 (100%)             |                       |
| Informal              | 6 (0.9%)                  | —                     |                       |
| None                  | 2 (0.3%)                  | —                     |                       |

*P*, *p*-value; —, not applicable.

**SUPPLEMENTAL TABLE 6** Baseline Characteristics of Tested Versus Not Tested for Bayley-III Outcomes (Among Those With at Least 1 Valid Assessment) of all Children in the Tshipidi Study, Botswana 2010–2012

| Characteristic               | Tested ( <i>N</i> = 724), <i>N</i> (% of total) | Not Tested ( <i>N</i> = 133), <i>N</i> (% of total) | <i>P</i> ( $\chi^2$ or <i>t</i> test) |
|------------------------------|-------------------------------------------------|-----------------------------------------------------|---------------------------------------|
| HIV-exposed                  |                                                 |                                                     | <.01                                  |
| Yes                          | 337 (46.5)                                      | 89 (66.9)                                           | —                                     |
| Sex                          |                                                 |                                                     | .38                                   |
| Female                       | 367 (50.7)                                      | 73 (54.9)                                           | —                                     |
| Birth weight                 |                                                 |                                                     | <.01                                  |
| Low birth weight             | 92 (12.8)                                       | 26 (22.0)                                           | —                                     |
| Breastfed                    |                                                 |                                                     | <.01                                  |
| Ever breastfed               | 415 (57.3)                                      | 46 (34.6)                                           | —                                     |
| Prematurity (<37 wk)         |                                                 |                                                     | <.01                                  |
| Premature                    | 89 (12.8)                                       | 28 (22.2)                                           | —                                     |
| Maternal age                 |                                                 |                                                     | .33                                   |
| 18–24                        | 293 (40.5)                                      | 57 (42.9)                                           | —                                     |
| 25–29                        | 177 (24.5)                                      | 35 (26.3)                                           | —                                     |
| 30–34                        | 133 (18.4)                                      | 28 (21.1)                                           | —                                     |
| 35–39                        | 100 (13.8)                                      | 12 (9.0)                                            | —                                     |
| 40–44                        | 20 (2.8)                                        | 1 (0.8)                                             | —                                     |
| Maternal education           |                                                 |                                                     | .18                                   |
| None                         | 10 (1.4)                                        | 3 (2.3)                                             | —                                     |
| Primary                      | 60 (8.3)                                        | 10 (7.7)                                            | —                                     |
| Secondary junior             | 362 (50.1)                                      | 53 (40.8)                                           | —                                     |
| Secondary senior or tertiary | 290 (40.2)                                      | 64 (49.2)                                           | —                                     |
| Maternal income              |                                                 |                                                     | .11                                   |
| None                         | 466 (64.5)                                      | 73 (56.2)                                           | —                                     |
| <P500                        | 37 (5.1)                                        | 4 (3.1)                                             | —                                     |
| P501–P1000                   | 96 (13.3)                                       | 24 (18.5)                                           | —                                     |
| >P1000                       | 123 (17.0)                                      | 29 (22.3)                                           | —                                     |
| Access to sanitation         |                                                 |                                                     | <.01                                  |
| Indoor                       | 155 (21.6)                                      | 47 (36.4)                                           | —                                     |
| Private                      | 481 (66.9)                                      | 65 (50.4)                                           | —                                     |
| Shared                       | 83 (11.5)                                       | 16 (12.4)                                           | —                                     |
| Access to electricity        |                                                 |                                                     | .01                                   |
| Yes                          | 412 (57.0)                                      | 89 (68.5)                                           | —                                     |
| Access to water              |                                                 |                                                     | <.01                                  |
| Home                         | 143 (19.8)                                      | 46 (35.4)                                           | —                                     |
| Yard                         | 495 (68.5)                                      | 70 (53.9)                                           | —                                     |
| Communal                     | 74 (10.2)                                       | 14 (10.8)                                           | —                                     |
| Other                        | 11 (1.5)                                        | 0 (0)                                               | —                                     |
| Cooking method               |                                                 |                                                     | <.01                                  |
| Gas, electric                | 525 (72.6)                                      | 113 (86.9)                                          | —                                     |
| Wood                         | 181 (25.0)                                      | 2 (1.5)                                             | —                                     |
| Kerosene                     | 8 (1.1)                                         | 15 (11.5)                                           | —                                     |
| None                         | 9 (1.2)                                         | 0 (0)                                               | —                                     |
| Housing type                 |                                                 |                                                     | .62                                   |
| Formal                       | 715 (98.9)                                      | 128 (98.5)                                          | —                                     |
| Informal                     | 6 (0.8)                                         | 2 (1.5)                                             | —                                     |
| None                         | 2 (0.3)                                         | 0 (0.0)                                             | —                                     |

P, *p* value; —, not applicable.

**SUPPLEMENTAL TABLE 7** Unadjusted Mean Bayley-III Neurodevelopment Domain Scores and Univariate Analysis for All Children in the Tshipidi Study (With at Least 1 Valid Bayley-III Assessment), Botswana 2010–2012

|                     | Bayley-III Cognitive |      |     | Bayley-III Gross Motor |     |      | Bayley-III Fine Motor |      |     | Bayley-III Expressive Language |     |      | Bayley-III Receptive Language |      |     |     |     |      |     |     |
|---------------------|----------------------|------|-----|------------------------|-----|------|-----------------------|------|-----|--------------------------------|-----|------|-------------------------------|------|-----|-----|-----|------|-----|-----|
|                     | N                    | Mean | SD  | P                      | N   | Mean | SD                    | P    | N   | Mean                           | SD  | P    | N                             | Mean | SD  | P   |     |      |     |     |
| Total               | 658                  | 53.4 | 3.3 | —                      | 642 | 52.8 | 2.7                   | —    | 669 | 37.3                           | 1.8 | —    | 653                           | 25.4 | 4.2 | —   | 653 | 20.9 | 3.4 | —   |
| HIV exposure status |                      |      |     | <.01                   |     |      |                       | .21  |     |                                |     | .47  |                               |      |     | .02 |     |      |     | .21 |
| HIV-unexposed       | 348                  | 53.0 | 3.3 |                        | 336 | 52.9 | 2.7                   |      | 358 | 37.4                           | 1.8 |      | 348                           | 25.8 | 4.1 |     | 348 | 20.7 | 3.3 |     |
| HIV-exposed         | 310                  | 53.8 | 3.4 |                        | 306 | 52.6 | 2.8                   | .25  | 311 | 37.3                           | 1.8 | <.01 | 305                           | 25.0 | 4.4 | .03 | 305 | 21.1 | 3.5 | .02 |
| Sex                 |                      |      |     | .03                    |     |      |                       |      |     |                                |     |      |                               |      |     |     |     |      |     |     |
| Female              | 337                  | 53.7 | 3.4 |                        | 328 | 52.7 | 2.9                   |      | 341 | 37.6                           | 1.7 |      | 337                           | 25.8 | 4.1 |     | 337 | 21.2 | 3.3 |     |
| Male                | 321                  | 53.1 | 3.3 |                        | 314 | 52.9 | 2.6                   |      | 328 | 37.0                           | 1.9 | .12  | 316                           | 25.1 | 4.3 | .03 | 316 | 20.6 | 3.5 | .16 |
| Birth weight        |                      |      |     | <.01                   |     |      |                       |      |     |                                |     |      |                               |      |     |     |     |      |     |     |
| Normal              | 572                  | 53.5 | 3.3 |                        | 560 | 52.9 | 2.7                   |      | 582 | 37.4                           | 1.8 |      | 568                           | 25.6 | 4.2 |     | 567 | 21.0 | 3.4 |     |
| Low birth weight    | 82                   | 52.4 | 3.7 |                        | 78  | 51.7 | 3.0                   |      | 83  | 37.0                           | 1.7 |      | 81                            | 24.5 | 4.4 |     | 82  | 20.4 | 3.5 |     |
| Ever breastfed      |                      |      |     | <.01                   |     |      |                       | .45  |     |                                |     | .75  |                               |      |     | .02 |     |      |     | .41 |
| Not breastfed       | 283                  | 53.8 | 3.3 |                        | 279 | 52.7 | 2.8                   |      | 283 | 37.3                           | 1.8 |      | 280                           | 25.0 | 4.4 |     | 279 | 21.0 | 3.6 |     |
| Breastfed           | 375                  | 53.1 | 3.4 |                        | 363 | 52.9 | 2.7                   |      | 386 | 37.3                           | 1.8 |      | 373                           | 25.8 | 4.1 |     | 374 | 20.8 | 3.3 |     |
| Prematurity         |                      |      |     | .15                    |     |      |                       | <.01 |     |                                |     | .09  |                               |      |     | .86 |     |      |     | .06 |
| Term                | 561                  | 53.5 | 3.4 |                        | 544 | 52.9 | 2.6                   |      | 569 | 37.3                           | 1.7 |      | 556                           | 25.4 | 4.2 |     | 555 | 21.0 | 3.4 |     |
| Premature           | 73                   | 52.9 | 3.1 |                        | 73  | 52.0 | 3.2                   |      | 76  | 37.0                           | 2.2 |      | 73                            | 25.3 | 4.5 |     | 74  | 20.2 | 3.5 |     |
| Maternal viral load |                      |      |     | .99                    |     |      |                       | .64  |     |                                |     | .93  |                               |      |     | .29 |     |      |     | .75 |
| Missing (HUU)       | 351                  | 53.0 | 3.3 |                        | 340 | 52.9 | 2.7                   |      | 361 | 37.3                           | 1.8 |      | 351                           | 25.8 | 4.1 |     | 351 | 20.7 | 3.3 |     |
| ≤400                | 116                  | 53.7 | 3.4 |                        | 112 | 52.9 | 2.4                   |      | 115 | 37.3                           | 1.7 |      | 113                           | 25.2 | 4.1 |     | 114 | 21.0 | 3.0 |     |
| 400–999             | 28                   | 53.4 | 3.6 |                        | 27  | 52.2 | 3.5                   |      | 28  | 37.3                           | 2.3 |      | 28                            | 25.4 | 4.1 |     | 28  | 21.0 | 3.1 |     |
| 1000–9999           | 72                   | 54.4 | 3.0 |                        | 73  | 52.4 | 3.2                   |      | 72  | 37.3                           | 1.9 |      | 71                            | 25.1 | 4.7 |     | 71  | 21.2 | 3.5 |     |
| ≥10000              | 91                   | 53.5 | 3.4 |                        | 90  | 52.7 | 2.7                   |      | 93  | 37.3                           | 1.7 |      | 90                            | 24.5 | 4.6 |     | 89  | 21.1 | 4.2 |     |
| Maternal CD4        |                      |      |     | .54                    |     |      |                       | .67  |     |                                |     | .23  |                               |      |     | .19 |     |      |     | .34 |
| Missing (HUU)       | 348                  | 53.0 | 3.3 |                        | 336 | 52.9 | 2.7                   |      | 358 | 37.3                           | 1.8 |      | 347                           | 25.8 | 4.1 |     | 347 | 20.7 | 3.3 |     |
| <200                | 19                   | 53.2 | 3.0 |                        | 19  | 52.7 | 2.3                   |      | 19  | 36.7                           | 2.2 |      | 19                            | 24.7 | 4.2 |     | 19  | 20.7 | 4.0 |     |
| 200–349             | 69                   | 53.6 | 3.1 |                        | 68  | 52.7 | 3.0                   |      | 71  | 37.2                           | 1.6 |      | 69                            | 24.9 | 4.3 |     | 68  | 21.0 | 2.9 |     |
| 300–499             | 116                  | 54.0 | 3.6 |                        | 115 | 52.7 | 2.6                   |      | 116 | 37.3                           | 1.9 |      | 114                           | 24.5 | 4.6 |     | 115 | 20.8 | 3.9 |     |
| ≥500                | 106                  | 53.8 | 3.1 |                        | 104 | 52.5 | 3.0                   |      | 105 | 37.4                           | 1.8 |      | 104                           | 25.7 | 4.1 |     | 104 | 21.4 | 3.5 |     |
| ART                 |                      |      |     | .31                    |     |      |                       | .77  |     |                                |     | .60  |                               |      |     | .26 |     |      |     | .79 |
| None (HUU)          | 348                  | 53.0 | 3.3 |                        | 336 | 52.9 | 2.7                   |      | 358 | 37.3                           | 1.8 |      | 347                           | 25.8 | 4.1 |     | 347 | 20.7 | 3.3 |     |
| ZDV                 | 538                  | 53.4 | 3.4 |                        | 525 | 52.8 | 2.8                   |      | 550 | 37.3                           | 1.8 |      | 536                           | 25.5 | 4.2 |     | 535 | 20.9 | 3.5 |     |
| 3-drug ART          | 115                  | 53.1 | 3.2 |                        | 112 | 52.7 | 2.5                   |      | 114 | 37.2                           | 1.8 |      | 112                           | 25.0 | 4.1 |     | 113 | 20.8 | 3.1 |     |
| Maternal age        |                      |      |     | .02                    |     |      |                       | .17  |     |                                |     | .90  |                               |      |     | .72 |     |      |     | .14 |
| 18–24               | 265                  | 52.9 | 3.3 |                        | 256 | 52.5 | 2.9                   |      | 271 | 37.2                           | 1.8 |      | 263                           | 25.4 | 4.3 |     | 262 | 20.6 | 3.8 |     |
| 25–29               | 157                  | 53.9 | 3.4 |                        | 155 | 53.0 | 2.6                   |      | 160 | 37.4                           | 1.9 |      | 159                           | 25.4 | 4.2 |     | 158 | 21.1 | 3.0 |     |
| 30–34               | 122                  | 53.4 | 3.6 |                        | 121 | 53.1 | 2.72                  |      | 124 | 37.5                           | 1.9 |      | 121                           | 25.9 | 4.2 |     | 122 | 21.3 | 3.3 |     |
| 35–39               | 94                   | 53.6 | 3.0 |                        | 91  | 52.7 | 2.46                  |      | 94  | 37.0                           | 1.7 |      | 91                            | 25.1 | 4.1 |     | 92  | 20.7 | 3.1 |     |
| 40–44               | 19                   | 54.4 | 3.0 |                        | 18  | 53.4 | 2.68                  |      | 19  | 37.6                           | 1.5 |      | 18                            | 24.6 | 5.1 |     | 18  | 21.6 | 2.0 |     |

TABLE 7 Continued

|                              | Bayley-III Cognitive |      |      |      |  | Bayley-III Gross Motor |      |     |      |   | Bayley-III Fine Motor |      |     |      |   | Bayley-III Expressive Language |      |     |      |  | Bayley-III Receptive Language |      |     |     |  |
|------------------------------|----------------------|------|------|------|--|------------------------|------|-----|------|---|-----------------------|------|-----|------|---|--------------------------------|------|-----|------|--|-------------------------------|------|-----|-----|--|
|                              | N                    | Mean | SD   | P    |  | N                      | Mean | SD  | P    |   | N                     | Mean | SD  | P    |   | N                              | Mean | SD  | P    |  | N                             | Mean | SD  | P   |  |
| Maternal education           | 10                   | 53.7 | 2.2  | .47  |  | 9                      | 52.4 | 3.5 | .02  |   | 10                    | 37.0 | 1.2 | .01  |   | 10                             | 24.0 | 4.7 | <.01 |  | 10                            | 19.9 | 2.9 | .75 |  |
| None                         | 56                   | 52.8 | 3.5  |      |  | 56                     | 51.8 | 3.0 |      |   | 56                    | 37.1 | 1.8 |      |   | 55                             | 23.2 | 4.1 |      |  | 55                            | 20.3 | 3.2 |     |  |
| Primary                      | 330                  | 53.4 | 3.3  |      |  | 323                    | 52.8 | 2.6 |      |   | 333                   | 37.2 | 1.8 |      |   | 328                            | 25.6 | 4.2 |      |  | 329                           | 21.2 | 3.5 |     |  |
| Secondary junior             | 262                  | 53.4 | 3.3  |      |  | 253                    | 53.0 | 2.7 |      |   | 269                   | 37.5 | 1.8 |      |   | 260                            | 25.8 | 4.1 |      |  | 259                           | 20.6 | 3.3 |     |  |
| Secondary senior or tertiary | 426                  | 53.1 | 3.4  | <.01 |  | 409                    | 52.6 | 2.7 | .04  |   | 434                   | 37.2 | 1.8 | .16  |   | 423                            | 25.5 | 4.1 | .49  |  | 424                           | 20.7 | 3.3 | .20 |  |
| Maternal income              | 34                   | 53.4 | 3.3  |      |  | 33                     | 53.1 | 1.9 |      |   | 34                    | 37.2 | 1.7 |      |   | 33                             | 26.0 | 4.4 |      |  | 33                            | 22.8 | 5.1 |     |  |
| <P500                        | 87                   | 54.0 | 3.2  |      |  | 88                     | 53.0 | 2.9 |      |   | 88                    | 37.3 | 1.6 |      |   | 86                             | 24.7 | 4.5 |      |  | 86                            | 21.1 | 3.0 |     |  |
| P501-P1000                   | 110                  | 54.0 | 3.16 |      |  | 111                    | 53.1 | 2.7 |      |   | 112                   | 37.5 | 2.1 |      |   | 110                            | 25.5 | 4.3 |      |  | 109                           | 21.0 | 3.2 |     |  |
| >P1000                       | 138                  | 53.6 | 3.4  | .60  |  | 137                    | 53.0 | 2.8 | .30  |   | 143                   | 37.6 | 1.8 | <.01 |   | 138                            | 26.0 | 4.0 | .33  |  | 138                           | 21.0 | 3.2 | .48 |  |
| Access to sanitation         | 443                  | 53.2 | 3.3  |      |  | 428                    | 52.8 | 2.7 |      |   | 448                   | 37.3 | 1.8 |      |   | 439                            | 25.2 | 4.3 |      |  | 439                           | 20.8 | 3.5 |     |  |
| Indoor                       | 73                   | 54.2 | 3.4  | .30  |  | 73                     | 52.5 | 2.7 | .17  |   | 74                    | 37.0 | 1.8 | .68  |   | 72                             | 25.7 | 4.1 | .05  |  | 72                            | 21.5 | 3.0 | .47 |  |
| Private                      | 372                  | 53.3 | 3.5  |      |  | 363                    | 52.9 | 2.8 |      |   | 383                   | 37.3 | 1.7 |      |   | 373                            | 25.3 | 4.2 |      |  | 373                           | 20.7 | 3.5 |     |  |
| Shared                       | 286                  | 53.5 | 3.2  | .70  |  | 279                    | 52.6 | 2.7 | <.01 |   | 286                   | 37.3 | 1.9 | .12  |   | 280                            | 25.6 | 4.2 | .66  |  | 280                           | 21.2 | 3.2 | .61 |  |
| Electricity                  | 124                  | 53.5 | 3.2  |      |  | 123                    | 53.0 | 2.9 |      |   | 129                   | 37.5 | 1.7 |      |   | 124                            | 25.8 | 3.8 |      |  | 124                           | 20.7 | 3.4 |     |  |
| Yes                          | 455                  | 53.3 | 3.4  |      |  | 440                    | 52.9 | 2.6 |      |   | 461                   | 37.3 | 1.8 |      |   | 452                            | 25.4 | 4.3 |      |  | 452                           | 20.9 | 3.4 |     |  |
| No                           | 68                   | 53.4 | 3.3  | .30  |  | 68                     | 51.6 | 2.8 | —    |   | 68                    | 37.0 | 1.7 |      |   | 66                             | 25.3 | 4.1 |      |  | 66                            | 21.4 | 3.2 |     |  |
| Access to water              | 11                   | 52.2 | 2.3  | .63  |  | 11                     | 51.2 | 3.6 | .04  |   | 11                    | 36.3 | 1.4 | .42  |   | 11                             | 24.2 | 4.3 | .15  |  | 11                            | 19.9 | 2.3 | .05 |  |
| Home                         | 478                  | 53.4 | 3.4  |      |  | 469                    | 52.9 | 2.7 |      |   | 487                   | 37.3 | 1.8 |      |   | 474                            | 25.6 | 4.2 |      |  | 474                           | 21.0 | 3.4 |     |  |
| Yard                         | 166                  | 53.2 | 3.3  | .70  |  | 159                    | 52.3 | 2.7 | <.01 |   | 167                   | 37.1 | 1.8 | .12  |   | 165                            | 25.0 | 4.2 | .66  |  | 165                           | 20.4 | 3.5 |     |  |
| Communal                     | 5                    | 53.4 | 1.5  |      |  | 5                      | 52.0 | 0.7 |      |   | 6                     | 37.7 | 1.5 |      |   | 5                              | 24.0 | 6.1 |      |  | 5                             | 20.6 | 3.4 |     |  |
| Other                        | 9                    | 54.7 | 2.1  | .70  |  | 9                      | 54.2 | 2.6 | .11  |   | 9                     | 37.9 | 1.3 | .11  |   | 9                              | 27.8 | 2.9 | .64  |  | 9                             | 23.2 | 1.9 | .68 |  |
| Cooking method               | 650                  | 53.4 | 3.3  |      |  | 634                    | 52.8 | 2.7 |      |   | 661                   | 37.3 | 1.8 |      |   | 645                            | 25.4 | 4.2 |      |  | 645                           | 20.9 | 3.4 |     |  |
| Gas, electric                | 6                    | 52.7 | 2.9  | .65  |  | 6                      | 50.5 | 2.9 | .02  |   | 6                     | 36.5 | 0.8 | .95  |   | 6                              | 24.3 | 4.8 | .16  |  | 6                             | 19.7 | 2.9 | .90 |  |
| Wood                         | 2                    | 55.0 | 5.7  |      |  | 2                      | 52.0 | 2.8 |      |   | 2                     | 35.0 | 0.0 |      |   | 2                              | 27.5 | 0.7 |      |  | 2                             | 21.0 | 1.4 |     |  |
| Kerosene                     | 227                  | 53.3 | 3.5  |      |  | 223                    | 53.0 | 2.5 |      |   | 233                   | 37.3 | 1.8 |      |   | 228                            | 25.7 | 4.1 |      |  | 226                           | 20.9 | 3.1 |     |  |
| None                         | 146                  | 53.4 | 3.3  | .06  |  | 141                    | 52.9 | 2.9 | .31  |   | 148                   | 37.3 | 1.8 | .78  |   | 146                            | 25.3 | 4.5 | .45  |  | 146                           | 20.6 | 4.1 |     |  |
| Housing type                 | 162                  | 53.8 | 3.4  |      |  | 161                    | 52.6 | 2.6 |      |   | 166                   | 37.4 | 1.9 |      |   | 159                            | 25.5 | 4.1 |      |  | 160                           | 21.4 | 3.0 |     |  |
| Formal                       | 122                  | 52.9 | 2.9  | .06  |  | 116                    | 52.3 | 2.9 | .02  |   | 121                   | 37.1 | 1.7 | .78  |   | 119                            | 25.0 | 4.1 | .16  |  | 120                           | 20.6 | 3.3 |     |  |
| Informal                     | —                    | —    | —    |      |  | —                      | —    | —   |      | — | —                     | —    |     |      | — | —                              | —    |     |      |  | —                             | —    | —   |     |  |
| None                         | —                    | —    | —    |      |  | —                      | —    | —   |      | — | —                     | —    |     |      | — | —                              | —    |     |      |  | —                             | —    | —   |     |  |
| Food insecurity              | —                    | —    | —    |      |  | —                      | —    | —   |      | — | —                     | —    |     |      | — | —                              | —    |     |      |  | —                             | —    | —   |     |  |
| Mild                         | —                    | —    | —    |      |  | —                      | —    | —   |      | — | —                     | —    |     |      | — | —                              | —    |     |      |  | —                             | —    | —   |     |  |
| Moderate                     | —                    | —    | —    |      |  | —                      | —    | —   |      | — | —                     | —    |     |      | — | —                              | —    |     |      |  | —                             | —    | —   |     |  |
| Severe                       | —                    | —    | —    |      |  | —                      | —    | —   |      | — | —                     | —    |     |      | — | —                              | —    |     |      |  | —                             | —    | —   |     |  |
| Depression                   | —                    | —    | —    |      |  | —                      | —    | —   |      | — | —                     | —    |     |      | — | —                              | —    |     |      |  | —                             | —    | —   |     |  |
| High score                   | —                    | —    | —    |      |  | —                      | —    | —   |      | — | —                     | —    |     |      | — | —                              | —    |     |      |  | —                             | —    | —   |     |  |

TABLE 7 Continued

|                | Bayley-III Cognitive |      |     | Bayley-III Gross Motor |     |      | Bayley-III Fine Motor |     |     | Bayley-III Expressive Language |     |     | Bayley-III Receptive Language |      |     |     |
|----------------|----------------------|------|-----|------------------------|-----|------|-----------------------|-----|-----|--------------------------------|-----|-----|-------------------------------|------|-----|-----|
|                | N                    | Mean | SD  | P                      | N   | Mean | SD                    | P   | N   | Mean                           | SD  | P   | N                             | Mean | SD  | P   |
| Social support | —                    | —    | —   | .06                    | —   | —    | —                     | .11 | —   | —                              | —   | .76 | —                             | —    | —   | .49 |
| High score     | —                    | —    | —   | —                      | —   | —    | —                     | —   | —   | —                              | —   | —   | —                             | —    | —   | —   |
| Stigma         | —                    | —    | —   | .17                    | —   | —    | —                     | .82 | —   | —                              | —   | .63 | —                             | —    | —   | .23 |
| High score     | —                    | —    | —   | —                      | —   | —    | —                     | —   | —   | —                              | —   | —   | —                             | —    | —   | —   |
| Alcohol use    | —                    | —    | —   | .07                    | —   | —    | —                     | .63 | —   | —                              | —   | .43 | —                             | —    | —   | .70 |
| Ever used      | 45                   | 53.1 | 2.8 | —                      | 46  | 52.5 | 2.9                   | —   | 45  | 37.2                           | 1.8 | —   | 45                            | 25.9 | 3.8 | —   |
| Never used     | 489                  | 53.6 | 3.4 | —                      | 477 | 52.7 | 2.7                   | —   | 498 | 37.2                           | 1.8 | —   | 485                           | 25.1 | 4.2 | —   |
| Tobacco use    | —                    | —    | —   | .43                    | —   | —    | —                     | .55 | —   | —                              | —   | .02 | —                             | —    | —   | .23 |
| Ever used      | 9                    | 54.0 | 2.0 | —                      | 9   | 53.1 | 1.5                   | —   | 9   | 36.6                           | 1.2 | —   | 9                             | 26.9 | 3.2 | —   |
| Never used     | 11                   | 54.0 | 3.5 | —                      | 10  | 53.1 | 4.2                   | —   | 11  | 36.3                           | 1.4 | —   | 11                            | 24.3 | 5.8 | —   |

Percentage of participants missing values for variables: electricity in home: 0.1%, source of water: 0.1%, cooking method: 0.1%, housing: 0.1%, food insecurity: 0.1%, depression: 0%, social support: 5.5%, alcohol use (ever): 55.6%, tobacco use (ever): 58.8. P, *P*; pulla; —, not applicable

**SUPPLEMENTAL TABLE 8** Unadjusted Mean DMC Neurodevelopment Domain Scores and Univariate Analysis for All Children in the Tshipidi Study (With at Least 1 Valid Bayley-III Assessment), Botswana 2010–2012

|                              | DMC Locomotor |      |     | DMC Fine Motor |     |      | DMC Language |      |     | DMC Personal-Social |     |     |     |      |     |      |
|------------------------------|---------------|------|-----|----------------|-----|------|--------------|------|-----|---------------------|-----|-----|-----|------|-----|------|
|                              | N             | Mean | SD  | P              | N   | Mean | SD           | P    | N   | Mean                | SD  | P   |     |      |     |      |
| Total                        | 723           | 32.2 | 1.8 | —              | 718 | 19.3 | 2.1          | —    | 723 | 16.5                | 2.7 | —   | 720 | 44.8 | 4.2 | —    |
| HIV exposure status          |               |      |     |                |     |      |              |      |     |                     |     |     |     |      |     |      |
| HIV-unexposed                | 386           | 32.2 | 1.8 | .58            | 382 | 19.4 | 1.9          | .05  | 386 | 16.5                | 2.7 | .92 | 385 | 44.5 | 4.5 | .06  |
| HIV-exposed                  | 337           | 32.2 | 1.8 | .89            | 336 | 19.1 | 2.3          | .03  | 337 | 16.5                | 2.6 | .12 | 335 | 45.1 | 3.9 | <.01 |
| Sex                          |               |      |     |                |     |      |              |      |     |                     |     |     |     |      |     |      |
| Male                         | 357           | 32.2 | 1.6 | .05            | 356 | 19.1 | 2.1          | .67  | 357 | 16.3                | 2.7 | .19 | 355 | 44.4 | 4.7 | .95  |
| Birth weight                 |               |      |     |                |     |      |              |      |     |                     |     |     |     |      |     |      |
| Normal                       | 626           | 32.2 | 1.8 |                | 622 | 19.3 | 2.1          |      | 626 | 16.5                | 2.7 |     | 624 | 44.8 | 4.4 |      |
| Low birth weight             | 92            | 31.8 | 1.8 | .13            | 91  | 19.2 | 2.0          | .11  | 92  | 16.1                | 2.7 | .42 | 91  | 44.8 | 3.1 | .27  |
| Breastfeeding                |               |      |     |                |     |      |              |      |     |                     |     |     |     |      |     |      |
| Ever breastfed               | 309           | 32.1 | 1.9 |                | 308 | 19.1 | 2.2          |      | 309 | 16.4                | 2.7 |     | 307 | 45.0 | 4.1 |      |
| Not breastfed                | 414           | 32.3 | 1.8 | .02            | 410 | 19.4 | 2.0          | .08  | 414 | 16.5                | 2.6 | .35 | 413 | 44.6 | 4.4 | .22  |
| Prematurity                  |               |      |     |                |     |      |              |      |     |                     |     |     |     |      |     |      |
| Term                         | 608           | 32.3 | 1.7 |                | 604 | 19.3 | 2.1          |      | 608 | 16.5                | 2.7 |     | 605 | 44.8 | 4.2 |      |
| Premature                    | 89            | 31.8 | 2.8 | .56            | 88  | 18.9 | 2.4          | .33  | 89  | 16.2                | 2.9 | .86 | 89  | 44.2 | 4.7 | .97  |
| Maternal viral load          |               |      |     |                |     |      |              |      |     |                     |     |     |     |      |     |      |
| Missing (HUU)                | 388           | 32.2 | 1.9 |                | 384 | 19.4 | 1.9          |      | 388 | 16.5                | 2.7 |     | 387 | 44.6 | 4.5 |      |
| ≤400                         | 126           | 32.4 | 1.6 |                | 125 | 19.5 | 1.8          |      | 126 | 16.3                | 2.8 |     | 125 | 45.1 | 3.8 |      |
| 400–999                      | 29            | 31.8 | 1.7 |                | 29  | 18.0 | 2.6          |      | 29  | 16.7                | 3.1 |     | 29  | 44.9 | 3.4 |      |
| 1000–9999                    | 79            | 31.8 | 2.2 |                | 79  | 18.8 | 2.7          |      | 79  | 16.7                | 2.2 |     | 79  | 45.0 | 3.3 |      |
| ≥10000                       | 101           | 32.3 | 1.6 | .57            | 101 | 19.2 | 2.2          | .89  | 101 | 16.3                | 2.8 | .58 | 100 | 45.1 | 4.8 | .86  |
| Maternal CD4                 |               |      |     |                |     |      |              |      |     |                     |     |     |     |      |     |      |
| Missing (HUU)                | 385           | 32.2 | 1.8 |                | 381 | 19.4 | 1.9          |      | 385 | 16.5                | 2.7 |     | 384 | 44.5 | 4.5 |      |
| <200                         | 23            | 32.3 | 1.2 |                | 23  | 18.5 | 2.0          |      | 23  | 15.8                | 3.9 |     | 23  | 43.7 | 8.7 |      |
| 200–349                      | 77            | 32.3 | 1.5 |                | 77  | 19.3 | 2.2          |      | 77  | 16.7                | 2.5 |     | 77  | 45.6 | 3.0 |      |
| 300–499                      | 125           | 32.0 | 1.8 |                | 124 | 19.2 | 2.1          |      | 125 | 16.2                | 2.7 |     | 123 | 45.1 | 2.7 |      |
| ≥500                         | 113           | 32.1 | 2.2 | .97            | 113 | 18.9 | 2.5          | .44  | 113 | 16.6                | 2.5 | .46 | 113 | 45.0 | 4.3 | .98  |
| ART                          |               |      |     |                |     |      |              |      |     |                     |     |     |     |      |     |      |
| None (HUU)                   | —             | —    | —   | —              | —   | —    | —            | —    | —   | —                   | —   | —   | —   | —    | —   | —    |
| ZDV                          | 596           | 32.2 | 1.9 |                | 592 | 19.2 | 2.1          |      | 596 | 16.5                | 2.6 |     | 594 | 44.8 | 4.1 |      |
| 3-drug ART                   | 121           | 32.2 | 1.7 | .60            | 120 | 19.4 | 1.9          | .32  | 121 | 16.3                | 2.8 | .12 | 120 | 44.8 | 4.9 | .42  |
| Maternal age                 |               |      |     |                |     |      |              |      |     |                     |     |     |     |      |     |      |
| 18–24                        | 292           | 32.1 | 1.7 |                | 291 | 19.2 | 2.0          |      | 292 | 16.5                | 2.5 |     | 292 | 44.8 | 3.2 |      |
| 25–29                        | 177           | 32.3 | 1.8 |                | 176 | 19.2 | 2.3          |      | 177 | 16.7                | 2.6 |     | 177 | 45.3 | 3.5 |      |
| 30–34                        | 133           | 32.2 | 2.2 |                | 131 | 19.5 | 2.0          |      | 133 | 16.2                | 2.9 |     | 130 | 44.5 | 5.9 |      |
| 35–39                        | 100           | 32.1 | 2.0 |                | 99  | 19.1 | 2.3          |      | 100 | 16.2                | 3.1 |     | 100 | 44.2 | 5.6 |      |
| 40–44                        | 20            | 32.8 | 1.2 | .08            | 20  | 20.0 | 1.8          | <.01 | 20  | 15.9                | 2.4 | .02 | 20  | 45.5 | 2.5 | .82  |
| Maternal education           |               |      |     |                |     |      |              |      |     |                     |     |     |     |      |     |      |
| None                         | 10            | 31.4 | 2.1 |                | 10  | 17.6 | 2.6          |      | 10  | 16.8                | 1.9 |     | 10  | 45.6 | 3.0 |      |
| Primary                      | 60            | 31.9 | 2.3 |                | 60  | 19.2 | 2.4          |      | 60  | 15.9                | 2.3 |     | 60  | 44.9 | 3.3 |      |
| Secondary junior             | 362           | 32.2 | 1.9 |                | 359 | 19.0 | 2.2          |      | 362 | 16.3                | 2.8 |     | 360 | 44.7 | 5.0 |      |
| Secondary senior or tertiary | 289           | 32.3 | 1.7 | .12            | 287 | 19.6 | 1.8          | .51  | 289 | 16.8                | 2.5 | .75 | 288 | 44.9 | 3.4 | .49  |
| Maternal income              |               |      |     |                |     |      |              |      |     |                     |     |     |     |      |     |      |
| None                         | 466           | 32.1 | 1.8 |                | 462 | 19.2 | 2.1          |      | 466 | 16.5                | 2.7 |     | 465 | 44.7 | 4.2 |      |



TABLE 8 Continued

|                      | DMC Locomotor |      |     |      | DMC Fine Motor |      |     |      | DMC Language |      |     |     | DMC Personal-Social |      |     |     |
|----------------------|---------------|------|-----|------|----------------|------|-----|------|--------------|------|-----|-----|---------------------|------|-----|-----|
|                      | N             | Mean | SD  | P    | N              | Mean | SD  | P    | N            | Mean | SD  | P   | N                   | Mean | SD  | P   |
| <P500                | 37            | 32.3 | 1.5 |      | 37             | 19.1 | 2.3 |      | 37           | 16.4 | 2.7 |     | 37                  | 44.7 | 3.6 |     |
| P501-P1000           | 96            | 32.3 | 2.4 |      | 95             | 19.2 | 2.1 |      | 96           | 16.3 | 3.1 |     | 95                  | 44.9 | 6.0 |     |
| >P1000               | 122           | 32.5 | 1.4 |      | 122            | 19.5 | 2.1 |      | 122          | 16.6 | 2.2 |     | 121                 | 45.3 | 2.9 |     |
| Access to sanitation |               |      |     | .64  |                |      |     | .02  |              |      |     | .82 |                     |      |     | .28 |
| Indoor               | 155           | 32.3 | 2.0 |      | 154            | 19.5 | 1.9 |      | 155          | 16.7 | 2.7 |     | 154                 | 44.8 | 5.4 |     |
| Private              | 480           | 32.2 | 1.7 |      | 476            | 19.3 | 2.1 |      | 480          | 16.3 | 2.8 |     | 478                 | 44.7 | 3.9 |     |
| Shared               | 83            | 32.2 | 2.2 |      | 83             | 18.8 | 2.6 |      | 83           | 17.0 | 2.1 |     | 83                  | 45.7 | 3.7 |     |
| Electricity          |               |      |     | .57  |                |      |     | .05  |              |      |     | .75 |                     |      |     | .24 |
| Yes                  | 411           | 32.2 | 2.0 |      | 408            | 19.4 | 2.0 |      | 411          | 16.4 | 2.6 |     | 408                 | 44.6 | 4.4 |     |
| No                   | 311           | 32.1 | 1.6 |      | 309            | 19.1 | 2.2 |      | 311          | 16.5 | 2.8 |     | 311                 | 45.0 | 4.0 |     |
| Access to water      |               |      |     | .59  |                |      |     | .37  |              |      |     | .53 |                     |      |     | .57 |
| Home                 | 143           | 32.2 | 2.1 |      | 142            | 19.4 | 1.9 |      | 143          | 16.6 | 2.8 |     | 142                 | 44.5 | 5.6 |     |
| Yard                 | 494           | 32.2 | 1.8 |      | 490            | 19.3 | 2.1 |      | 494          | 16.4 | 2.7 |     | 492                 | 44.8 | 3.8 |     |
| Communal             | 74            | 32.5 | 1.4 |      | 74             | 18.9 | 2.3 |      | 74           | 16.8 | 2.0 |     | 74                  | 45.6 | 4.2 |     |
| Other                | 11            | 31.6 | 1.7 |      | 11             | 18.9 | 1.7 |      | 11           | 16.4 | 1.7 |     | 11                  | 44.7 | 2.4 |     |
| Cooking method       |               |      |     | <.01 |                |      |     | <.01 |              |      |     | .48 |                     |      |     | .20 |
| Gas, electric        | 524           | 32.3 | 1.8 |      | 520            | 19.4 | 2.0 |      | 524          | 16.6 | 2.7 |     | 521                 | 45.0 | 4.4 |     |
| Kerosene             | 181           | 31.9 | 1.7 |      | 180            | 19.0 | 2.2 |      | 181          | 16.1 | 2.6 |     | 181                 | 44.3 | 3.7 |     |
| Wood                 | 8             | 29.9 | 4.9 |      | 8              | 17.3 | 4.0 |      | 8            | 16.6 | 2.4 |     | 8                   | 41.3 | 7.7 |     |
| None                 | 9             | 32.2 | 1.3 |      | 9              | 20.2 | 1.0 |      | 9            | 16.0 | 0.0 |     | 9                   | 45.3 | 2.6 |     |
| Housing type         |               |      |     | .41  |                |      |     | .16  |              |      |     | .16 |                     |      |     | .37 |
| Formal               | 714           | 32.2 | 1.8 |      | 709            | 19.3 | 2.1 |      | 714          | 16.5 | 2.7 |     | 711                 | 44.8 | 4.3 |     |
| Informal             | 6             | 32.0 | 1.4 |      | 6              | 18.5 | 2.2 |      | 6            | 15.7 | 2.7 |     | 6                   | 43.7 | 3.8 |     |
| None                 | 2             | 30.5 | 0.7 |      | 2              | 20.5 | 0.7 |      | 2            | 17.0 | 1.4 |     | 2                   | 47.0 | 2.8 |     |
| Food insecurity      |               |      |     | .83  |                |      |     | .16  |              |      |     | .51 |                     |      |     | .07 |
| None                 | 252           | 32.1 | 2.3 |      | 248            | 19.3 | 2.0 |      | 252          | 16.5 | 3.0 |     | 250                 | 45.0 | 5.0 |     |
| Mild                 | 163           | 32.4 | 1.2 |      | 163            | 19.5 | 1.9 |      | 163          | 16.5 | 2.2 |     | 163                 | 44.8 | 2.6 |     |
| Moderate             | 176           | 32.2 | 1.4 |      | 176            | 19.1 | 2.1 |      | 176          | 16.5 | 2.4 |     | 175                 | 44.7 | 4.4 |     |
| Severe               | 131           | 32.1 | 2.0 |      | 130            | 19.1 | 2.3 |      | 131          | 16.3 | 2.9 |     | 131                 | 44.6 | 4.2 |     |
| Depression           |               |      |     | <.01 |                |      |     | .16  |              |      |     | .07 |                     |      |     | .03 |
| High score           | —             | —    | —   |      | —              | —    | —   |      | —            | —    | —   |     | —                   | —    | —   |     |
| Social support       |               |      |     | .02  |                |      |     | .04  |              |      |     | .09 |                     |      |     | .12 |
| High score           | —             | —    | —   |      | —              | —    | —   |      | —            | —    | —   |     | —                   | —    | —   |     |
| Stigma               | —             | —    | —   | .64  | —              | —    | —   | .86  | —            | —    | —   | .16 | —                   | —    | —   | .66 |
| High score           | —             | —    | —   |      | —              | —    | —   | .75  | —            | —    | —   | .38 | —                   | —    | —   | .96 |
| Alcohol use          |               |      |     | .80  |                |      |     | .75  |              |      |     | .38 |                     |      |     | .96 |
| Ever used            | 46            | 32.4 | 1.8 |      | 46             | 19.9 | 1.8 |      | 46           | 17.0 | 2.3 |     | 46                  | 45.1 | 4.6 |     |
| Never used           | 538           | 32.2 | 1.6 |      | 536            | 19.2 | 2.2 |      | 538          | 16.4 | 2.8 |     | 535                 | 44.8 | 4.4 |     |
| Tobacco use          |               |      |     | .54  |                |      |     | .33  |              |      |     | .01 |                     |      |     | .36 |
| Ever used            | 10            | 32.6 | 1.3 |      | 10             | 19.5 | 2.0 |      | 10           | 17.0 | 1.9 |     | 10                  | 45.2 | 2.8 |     |
| Never used           | 13            | 32.3 | 2.0 |      | 13             | 19.8 | 2.0 |      | 13           | 18.3 | 2.8 |     | 13                  | 45.8 | 3.0 |     |

Percentage of participants missing values for variables: electricity in home: 0.1%, source of water: 0.1%, cooking method: 0.1%, housing: 0.1%, food insecurity: 0.1%, depression: 0%, social support: 5.5%, alcohol use (ever): 55.6%, tobacco use (ever): 58.8%. P, p-value; —, not applicable.

**SUPPLEMENTAL TABLE 9** Sensitivity Analyses of Bayley-III and DMC Neurodevelopment Domain Scores for All Children in the Tshipidi Study (With at Least 1 Valid Bayley-III Assessment), Botswana 2010–2012

| Bayley-III Domain   | N   | Adjusted Difference HEU Versus HUU |     | Further Adjusted for Birth Weight |     | Further Adjusted for Prematurity |     |
|---------------------|-----|------------------------------------|-----|-----------------------------------|-----|----------------------------------|-----|
|                     |     | Mean Difference (95% CI)           | P   | Mean Difference (95% CI)          | P   | Mean Difference (95% CI)         | P   |
| Cognitive           | 657 | 0.6 (0.1 to 1.1)                   | .03 | 0.7 (0.2 to 1.2)                  | .01 | 0.7 (0.1 to 1.1)                 | .02 |
| Gross motor         | 642 | −0.1 (−0.5 to 0.3)                 | .63 | −0.1 (−0.5 to 0.4)                | .80 | −0.1 (−0.6 to 0.3)               | .56 |
| Fine motor          | 668 | 0.0 (−0.3 to 0.3)                  | .98 | 0.0 (−0.3 to 0.3)                 | .89 | 0.0 (−0.3 to 0.3)                | .97 |
| Expressive language | 652 | −0.6 (−1.3 to 0.1)                 | .09 | −0.5 (−1.2 to 0.1)                | .12 | −0.6 (−1.3 to 0.1)               | .08 |
| Receptive language  | 652 | 0.3 (−0.3 to 0.8)                  | .35 | 0.3 (−0.3 to 0.8)                 | .31 | 0.3 (−0.3 to 0.8)                | .36 |
| DMC domain          |     |                                    |     |                                   |     |                                  |     |
| Locomotor           | 723 | −0.1 (−0.3 to 0.2)                 | .66 | −0.1 (−0.3 to 0.2)                | .77 | −0.1 (−0.3 to 0.2)               | .67 |
| Fine motor          | 718 | −0.1 (−0.4 to 0.2)                 | .63 | −0.1 (−0.4 to 0.3)                | .71 | −0.1 (−0.4 to 0.2)               | .60 |
| Language            | 723 | 0.2 (−0.2 to 0.6)                  | .43 | 0.2 (−0.2 to 0.6)                 | .33 | 0.2 (−0.3 to 0.6)                | .43 |
| Personal-social     | 720 | 0.7 (0.1 to 1.3)                   | .02 | 0.7 (0.0 to 1.3)                  | .04 | 0.7 (0.1 to 1.4)                 | .02 |

CI, confidence interval.

**SUPPLEMENTAL TABLE 10** Baseline Characteristics of at Risk (at Risk, Low Score <1 SD Below Domain-Specific Mean, or Invalid) Versus Within Normal Range (Not at Risk, Not Low Score, Valid) Children in the Tshipidi Study, Botswana 2010–2012

|                              | Within Normal Range, <i>N</i> (%) | Low, Invalid, or at Risk, <i>N</i> (%) | <i>P</i> ( $\chi^2$ ) |
|------------------------------|-----------------------------------|----------------------------------------|-----------------------|
| Bayley-III cognitive         | 549 (81.3%)                       | 126 (18.7%)                            | —                     |
| HIV exposure status          |                                   |                                        | .05                   |
| HIV-exposed                  | 266 (48.5%)                       | 49 (38.9%)                             |                       |
| Sex                          |                                   |                                        | .07                   |
| Female                       | 289 (52.6%)                       | 55 (43.7%)                             |                       |
| Birth weight                 |                                   |                                        | .09                   |
| Low birth weight             | 62 (11.4%)                        | 21 (16.9%)                             |                       |
| Breastfed                    |                                   |                                        | .06                   |
| Ever breastfed               | 306 (55.7%)                       | 82 (65.1%)                             |                       |
| Prematurity (<37 wk)         |                                   |                                        | .99                   |
| Premature                    | 63 (11.8%)                        | 14 (11.9%)                             |                       |
| Maternal age                 |                                   |                                        | .03                   |
| 18–24                        | 207 (37.7%)                       | 67 (53.6%)                             |                       |
| 25–29                        | 142 (25.9%)                       | 17 (13.6%)                             |                       |
| 30–34                        | 101 (18.4%)                       | 24 (19.2%)                             |                       |
| 35–39                        | 82 (14.9%)                        | 15 (12.0%)                             |                       |
| 40–44                        | 17 (3.1%)                         | 2 (1.6%)                               |                       |
| Maternal education           |                                   |                                        | .60                   |
| None                         | 10 (1.8%)                         | 0 (0%)                                 |                       |
| Primary                      | 43 (7.8%)                         | 13 (10.3%)                             |                       |
| Secondary junior             | 278 (50.6%)                       | 60 (47.6%)                             |                       |
| Secondary senior or tertiary | 218 (39.7%)                       | 53 (42.1%)                             |                       |
| Maternal income              |                                   |                                        | .06                   |
| None                         | 349 (63.7%)                       | 90 (71.4%)                             |                       |
| <P500                        | 29 (5.3%)                         | 6 (4.8%)                               |                       |
| P501–P1000                   | 72 (13.1%)                        | 16 (12.7%)                             |                       |
| >P1000                       | 98 (17.9%)                        | 14 (11.1%)                             |                       |
| Access to sanitation         |                                   |                                        | .29                   |
| Indoor                       | 118 (21.6%)                       | 23 (18.4%)                             |                       |
| Private                      | 364 (66.7%)                       | 92 (73.6%)                             |                       |
| Shared                       | 64 (11.7%)                        | 10 (8.0%)                              |                       |
| Electricity                  |                                   |                                        | .98                   |
| Yes                          | 310 (56.5%)                       | 71 (56.4%)                             |                       |
| Access to water              |                                   |                                        | .98                   |
| Home                         | 105 (19.1%)                       | 23 (18.3%)                             |                       |
| Yard                         | 380 (69.2%)                       | 87 (69.1%)                             |                       |
| Communal                     | 55 (10.0%)                        | 14 (11.1%)                             |                       |
| Other                        | 9 (1.7%)                          | 2 (1.6%)                               |                       |
| Cooking method               |                                   |                                        | .44                   |
| Gas, electric                | 399 (72.7%)                       | 89 (70.6%)                             |                       |
| Wood                         | 136 (24.8%)                       | 36 (28.6%)                             |                       |
| Kerosene                     | 5 (0.9%)                          | 1 (0.8%)                               |                       |
| None                         | 9 (1.6%)                          | 0 (0%)                                 |                       |
| Housing type                 |                                   |                                        | .79                   |
| Formal                       | 542 (98.7%)                       | 125 (99.2%)                            |                       |
| Informal                     | 5 (0.9%)                          | 1 (0.8%)                               |                       |
| None                         | 2 (0.4%)                          | 0 (0%)                                 |                       |
| Bayley-III gross motor       | 542 (81.9%)                       | 120 (18.1%)                            | —                     |
| HIV exposure status          |                                   |                                        | .77                   |
| HIV-exposed                  | 254 (46.9%)                       | 58 (48.3%)                             |                       |
| Sex                          |                                   |                                        | .30                   |
| Female                       | 270 (49.8%)                       | 66 (55.0%)                             |                       |
| Birth weight                 |                                   |                                        | <.01                  |
| Low birth weight             | 56 (10.4%)                        | 23 (19.5%)                             |                       |
| Breastfed                    |                                   |                                        | .92                   |
| Ever breastfed               | 310 (57.2%)                       | 68 (56.7%)                             |                       |
| Premature                    |                                   |                                        | .15                   |
| Premature                    | 59 (11.2%)                        | 18 (16.1%)                             |                       |

**TABLE 10** Continued

|                              | Within Normal Range, <i>N</i> (%) | Low, Invalid, or at Risk, <i>N</i> (%) | <i>P</i> ( $\chi^2$ ) |
|------------------------------|-----------------------------------|----------------------------------------|-----------------------|
| Maternal age                 |                                   |                                        | .69                   |
| 18–24                        | 213 (39.4%)                       | 54 (45.0%)                             |                       |
| 25–29                        | 131 (24.2%)                       | 27 (22.5%)                             |                       |
| 30–34                        | 105 (19.4%)                       | 19 (15.8%)                             |                       |
| 35–39                        | 76 (14.1%)                        | 18 (15.0%)                             |                       |
| 40–44                        | 16 (3.0%)                         | 2 (1.7%)                               |                       |
| Maternal education           |                                   |                                        | .98                   |
| None                         | 8 (1.5%)                          | 1 (0.8%)                               |                       |
| Primary                      | 42 (7.8%)                         | 14 (11.8%)                             |                       |
| Secondary junior             | 278 (51.3%)                       | 54 (45.4%)                             |                       |
| Secondary senior or tertiary | 214 (39.5%)                       | 50 (42.0%)                             |                       |
| Maternal income              |                                   |                                        | .15                   |
| None                         | 341 (63.0%)                       | 84 (70.0%)                             |                       |
| <P500                        | 29 (5.4%)                         | 5 (4.2%)                               |                       |
| P501–P1000                   | 74 (13.7%)                        | 15 (12.5%)                             |                       |
| >P1000                       | 97 (17.9%)                        | 16 (13.3%)                             |                       |
| Access to sanitation         |                                   |                                        | .68                   |
| Indoor                       | 118 (21.9%)                       | 24 (20.2%)                             |                       |
| Private                      | 363 (67.4%)                       | 79 (66.4%)                             |                       |
| Shared                       | 58 (10.8%)                        | 16 (13.5%)                             |                       |
| Access to electricity        |                                   |                                        | .33                   |
| Yes                          | 311 (57.4%)                       | 63 (52.5%)                             |                       |
| Access to water              |                                   |                                        | .02                   |
| Home                         | 109 (20.1%)                       | 20 (16.7%)                             |                       |
| Yard                         | 377 (69.6%)                       | 75 (62.5%)                             |                       |
| Communal                     | 49 (9.0%)                         | 21 (17.5%)                             |                       |
| Other                        | 7 (1.3%)                          | 4 (3.3%)                               |                       |
| Cooking method               |                                   |                                        | .23                   |
| Gas, electric                | 399 (73.6%)                       | 82 (68.3%)                             |                       |
| Wood                         | 129 (23.8%)                       | 37 (30.8%)                             |                       |
| Kerosene                     | 5 (0.9%)                          | 1 (0.8%)                               |                       |
| None                         | 9 (1.7%)                          | 0 (0%)                                 |                       |
| Housing type                 |                                   |                                        | .06                   |
| Formal                       | 538 (99.3%)                       | 116 (96.7%)                            |                       |
| Informal                     | 3 (0.6%)                          | 3 (2.5%)                               |                       |
| None                         | 1 (0.2%)                          | 1 (0.8%)                               |                       |
| Bayley-III fine motor        | 585 (85.8%)                       | 97 (14.2%)                             | —                     |
| HIV exposure status          |                                   |                                        | .63                   |
| HIV-exposed                  | 268 (45.8%)                       | 47 (48.5%)                             |                       |
| Sex                          |                                   |                                        | <.01                  |
| Female                       | 314 (53.7%)                       | 33 (34.0%)                             |                       |
| Birth weight                 |                                   |                                        | .94                   |
| Low birth weight             | 72 (12.4%)                        | 12 (12.6%)                             |                       |
| Breastfed                    |                                   |                                        | .79                   |
| Ever breastfed               | 340 (58.1%)                       | 55 (56.7%)                             |                       |
| Prematurity (<37 wk)         |                                   |                                        | <.01                  |
| Premature                    | 58 (10.3%)                        | 22 (23.2%)                             |                       |
| Maternal age                 |                                   |                                        | .50                   |
| 18–24                        | 239 (40.9%)                       | 38 (39.2%)                             |                       |
| 25–29                        | 134 (23.0%)                       | 28 (28.9%)                             |                       |
| 30–34                        | 109 (18.7%)                       | 17 (17.5%)                             |                       |
| 35–39                        | 83 (14.2%)                        | 14 (14.4%)                             |                       |
| 40–44                        | 19 (3.3%)                         | 0 (0%)                                 |                       |
| Maternal education           |                                   |                                        | .42                   |
| None                         | 9 (1.5%)                          | 1 (1.0%)                               |                       |
| Primary                      | 47 (8.0%)                         | 9 (9.4%)                               |                       |
| Secondary junior             | 289 (49.4%)                       | 52 (54.2%)                             |                       |
| Secondary senior or tertiary | 240 (41.0%)                       | 34 (35.4%)                             |                       |
| Maternal income              |                                   |                                        | .88                   |
| None                         | 378 (64.7%)                       | 66 (68.0%)                             |                       |
| <P500                        | 32 (5.5%)                         | 3 (3.1%)                               |                       |

TABLE 10 Continued

|                                | Within Normal Range, <i>N</i> (%) | Low, Invalid, or at Risk, <i>N</i> (%) | <i>P</i> ( $\chi^2$ ) |
|--------------------------------|-----------------------------------|----------------------------------------|-----------------------|
| P501–P1000                     | 79 (13.5%)                        | 10 (10.3%)                             |                       |
| >P1000                         | 95 (16.3%)                        | 18 (18.6%)                             |                       |
| Access to sanitation           |                                   |                                        | .18                   |
| Indoor                         | 126 (21.7%)                       | 19 (19.6%)                             |                       |
| Private                        | 396 (68.2%)                       | 62 (63.9%)                             |                       |
| Shared                         | 59 (10.2%)                        | 16 (16.5%)                             |                       |
| Electricity                    |                                   |                                        | .77                   |
| Yes                            | 335 (57.3%)                       | 54 (55.7%)                             |                       |
| Access to water                |                                   |                                        | .66                   |
| Home                           | 114 (19.5%)                       | 18 (18.6%)                             |                       |
| Yard                           | 405 (69.2%)                       | 65 (67.0%)                             |                       |
| Communal                       | 58 (9.9%)                         | 11 (11.3%)                             |                       |
| Other                          | 8 (1.4%)                          | 3 (3.1%)                               |                       |
| Cooking method                 |                                   |                                        | .32                   |
| Gas, electric                  | 426 (72.8%)                       | 68 (70.1%)                             |                       |
| Wood                           | 6 (1.0%)                          | 0 (0%)                                 |                       |
| Kerosene                       | 144 (24.6%)                       | 29 (29.9%)                             |                       |
| None                           | 9 (1.5%)                          | 0 (0%)                                 |                       |
| Housing type                   |                                   |                                        | <.01                  |
| Formal                         | 579 (99.0%)                       | 95 (97.9%)                             |                       |
| Informal                       | 6 (1.0%)                          | 0 (0%)                                 |                       |
| None                           | 0 (0%)                            | 2 (2.1%)                               |                       |
| Bayley-III expressive language | 513 (76.2%)                       | 160 (23.8%)                            | —                     |
| HIV exposure status            |                                   |                                        | .04                   |
| HIV-exposed                    | 226 (44.1%)                       | 85 (53.1%)                             |                       |
| Sex                            |                                   |                                        | .10                   |
| Female                         | 272 (53.0%)                       | 87 (54.4%)                             |                       |
| Birth weight                   |                                   |                                        | .19                   |
| Low birth weight               | 58 (11.4%)                        | 24 (15.3%)                             |                       |
| Breastfed                      |                                   |                                        | .09                   |
| Ever breastfed                 | 305 (59.5%)                       | 83 (51.9%)                             |                       |
| Premature                      |                                   |                                        | .81                   |
| Premature                      | 58 (11.7%)                        | 19 (12.4%)                             |                       |
| Maternal age                   |                                   |                                        | .82                   |
| 18–24                          | 207 (40.4%)                       | 67 (41.9%)                             |                       |
| 25–29                          | 120 (23.4%)                       | 42 (26.3%)                             |                       |
| 30–34                          | 102 (19.9%)                       | 22 (13.8%)                             |                       |
| 35–39                          | 71 (13.9%)                        | 23 (14.4%)                             |                       |
| 40–44                          | 12 (2.3%)                         | 6 (3.8%)                               |                       |
| Maternal education             |                                   |                                        | .12                   |
| None                           | 6 (1.2%)                          | 4 (2.5%)                               |                       |
| Primary                        | 36 (7.0%)                         | 19 (11.9%)                             |                       |
| Secondary junior               | 264 (51.5%)                       | 73 (45.6%)                             |                       |
| Secondary senior or tertiary   | 207 (40.4%)                       | 64 (40.0%)                             |                       |
| Maternal income                |                                   |                                        | .26                   |
| None                           | 339 (66.2%)                       | 100 (62.5%)                            |                       |
| <P500                          | 26 (5.1%)                         | 8 (5.0%)                               |                       |
| P501–P1000                     | 59 (11.5%)                        | 28 (17.5%)                             |                       |
| >P1000                         | 88 (17.2%)                        | 24 (15.0%)                             |                       |
| Access to sanitation           |                                   |                                        | .24                   |
| Indoor                         | 116 (22.8%)                       | 27 (17.0%)                             |                       |
| Private                        | 337 (66.1%)                       | 116 (73.0%)                            |                       |
| Shared                         | 57 (11.2%)                        | 16 (10.1%)                             |                       |
| Electricity                    |                                   |                                        | .81                   |
| Yes                            | 294 (57.3%)                       | 90 (56.3%)                             |                       |
| Access to water                |                                   |                                        | .50                   |
| Home                           | 107 (20.9%)                       | 23 (14.4%)                             |                       |
| Yard                           | 348 (67.8%)                       | 116 (72.5%)                            |                       |
| Communal                       | 49 (9.6%)                         | 19 (11.9%)                             |                       |
| Other                          | 9 (1.8%)                          | 2 (1.3%)                               |                       |
| Cooking method                 |                                   |                                        | .08                   |

**TABLE 10** Continued

|                               | Within Normal Range, <i>N</i> (%) | Low, Invalid, or at Risk, <i>N</i> (%) | <i>P</i> ( $\chi^2$ ) |
|-------------------------------|-----------------------------------|----------------------------------------|-----------------------|
| Gas, electric                 | 376 (73.3%)                       | 110 (68.8%)                            |                       |
| Wood                          | 125 (24.4%)                       | 47 (29.4%)                             |                       |
| Kerosene                      | 3 (0.6%)                          | 3 (1.9%)                               |                       |
| None                          | 9 (1.8%)                          | 0 (0%)                                 |                       |
| Housing type                  |                                   |                                        | .67                   |
| Formal                        | 506 (98.6%)                       | 159 (99.4%)                            |                       |
| Informal                      | 5 (1.0%)                          | 1 (0.6%)                               |                       |
| None                          | 2 (0.4%)                          | 0 (0%)                                 |                       |
| Bayley-III receptive language | 549 (81.6%)                       | 124 (18.4%)                            | —                     |
| HIV exposure status           |                                   |                                        | .95                   |
| HIV-exposed                   | 254 (46.3%)                       | 57 (46.0%)                             |                       |
| Sex                           |                                   |                                        | .09                   |
| Female                        | 290 (52.8%)                       | 55 (44.4%)                             |                       |
| Birth weight                  |                                   |                                        | .08                   |
| Low birth weight              | 62 (11.4%)                        | 21 (17.2%)                             |                       |
| Breastfed                     |                                   |                                        | .89                   |
| Ever breastfed                | 318 (57.9%)                       | 71 (57.3%)                             |                       |
| Premature                     |                                   |                                        | .04                   |
| Premature                     | 57 (10.8%)                        | 21 (17.5%)                             |                       |
| Maternal age                  |                                   |                                        | .05                   |
| 18–24                         | 210 (38.3%)                       | 63 (50.8%)                             |                       |
| 25–29                         | 138 (25.2%)                       | 23 (18.6%)                             |                       |
| 30–34                         | 107 (19.5%)                       | 18 (14.5%)                             |                       |
| 35–39                         | 75 (13.7%)                        | 20 (16.1%)                             |                       |
| 40–44                         | 18 (3.3%)                         | 0 (0%)                                 |                       |
| Maternal education            |                                   |                                        | .38                   |
| None                          | 8 (1.5%)                          | 2 (1.6%)                               |                       |
| Primary                       | 45 (8.2%)                         | 10 (8.1%)                              |                       |
| Secondary junior              | 284 (51.7%)                       | 54 (43.6%)                             |                       |
| Secondary senior or tertiary  | 212 (38.6%)                       | 58 (46.8%)                             |                       |
| Maternal income               |                                   |                                        | .24                   |
| None                          | 349 (63.7%)                       | 91 (73.4%)                             |                       |
| <P500                         | 29 (5.3%)                         | 5 (4.0%)                               |                       |
| P501–P1000                    | 75 (13.7%)                        | 12 (9.7%)                              |                       |
| >P1000                        | 95 (17.3%)                        | 16 (12.9%)                             |                       |
| Access to sanitation          |                                   |                                        | .26                   |
| Indoor                        | 119 (21.8%)                       | 24 (19.5%)                             |                       |
| Private                       | 363 (66.5%)                       | 90 (73.2%)                             |                       |
| Shared                        | 64 (11.7%)                        | 9 (7.3%)                               |                       |
| Access to electricity         |                                   |                                        | .29                   |
| Yes                           | 308 (56.1%)                       | 76 (61.3%)                             |                       |
| Access to water               |                                   |                                        | .90                   |
| Home                          | 104 (18.9%)                       | 26 (21.0%)                             |                       |
| Yard                          | 377 (68.7%)                       | 87 (70.2%)                             |                       |
| Communal                      | 58 (10.6%)                        | 10 (8.1%)                              |                       |
| Other                         | 10 (1.9%)                         | 1 (0.8%)                               |                       |
| Cooking method                |                                   |                                        | .02                   |
| Gas, electric                 | 407 (74.1%)                       | 79 (63.7%)                             |                       |
| Wood                          | 129 (23.5%)                       | 43 (34.7%)                             |                       |
| Kerosene                      | 4 (0.7%)                          | 2 (1.6%)                               |                       |
| None                          | 9 (1.6%)                          | 0 (0%)                                 |                       |
| Housing type                  |                                   |                                        | .51                   |
| Formal                        | 543 (98.9%)                       | 122 (98.4%)                            |                       |
| Informal                      | 4 (0.7%)                          | 2 (1.6%)                               |                       |
| None                          | 2 (0.4%)                          | 0 (0%)                                 |                       |

*P*, *p* value; —, not applicable.

**SUPPLEMENTAL TABLE 11** Univariate Predictors of Composite Adverse Bayley-III Outcomes (Low, Invalid, or at Risk) Neurodevelopment Domain Scores for All Children in the Tshipidi Study, Botswana 2010–2012

| Bayley-III               | Cognitive |                     |      | Gross Motor         |      |                     | Fine Motor |                     |     | Expressive Language |   |             | Receptive Language |             |  |
|--------------------------|-----------|---------------------|------|---------------------|------|---------------------|------------|---------------------|-----|---------------------|---|-------------|--------------------|-------------|--|
|                          | P         | OR (95% CI)         | P    | OR (95% CI)         | P    | OR (95% CI)         | P          | OR (95% CI)         | P   | OR (95% CI)         | P | OR (95% CI) | P                  | OR (95% CI) |  |
| HIV exposure status      | .05       |                     | .77  |                     | .63  |                     | .05        |                     | .95 |                     |   |             |                    |             |  |
| HIV-exposed vs unexposed |           | 0.68 (0.46 to 1.01) |      | 1.06 (0.71 to 1.58) |      | 1.11 (0.72 to 1.71) |            | 1.44 (1.01 to 2.06) |     | 0.99 (0.67 to 1.46) |   |             |                    |             |  |
| Sex                      | .07       |                     | .30  |                     | <.01 |                     | .10        |                     | .09 |                     |   |             |                    |             |  |
| Male vs female           |           | 1.44 (0.97 to 2.12) |      | 0.81 (0.55 to 1.21) |      | 2.24 (1.43 to 3.52) |            | 1.35 (0.94 to 1.92) |     | 1.41 (0.95 to 2.01) |   |             |                    |             |  |
| Birth weight             | .09       |                     | <.01 |                     | .94  |                     | .19        |                     | .08 |                     |   |             |                    |             |  |
| Low vs normal            |           | 1.59 (0.93 to 2.73) |      | 2.09 (1.23 to 3.56) |      | 1.02 (0.53 to 1.97) |            | 1.41 (0.84 to 2.36) |     | 1.62 (0.95 to 2.78) |   |             |                    |             |  |
| Breastfed                | .06       |                     | .92  |                     | .79  |                     | .09        |                     | .89 |                     |   |             |                    |             |  |
| Ever vs never            |           | 1.48 (0.99 to 2.22) |      | 0.98 (0.66 to 1.46) |      | 0.94 (0.61 to 1.46) |            | 0.74 (0.52 to 1.05) |     | 0.97 (0.66 to 1.44) |   |             |                    |             |  |
| Prematurity (<37 wk)     | .99       |                     | .16  |                     | <.01 |                     | .81        |                     | .04 |                     |   |             |                    |             |  |
| Premature vs term        |           | 1.00 (0.54 to 1.86) |      | 1.51 (0.85 to 2.68) |      | 2.62 (1.52 to 4.54) |            | 1.07 (0.62 to 1.86) |     | 1.76 (1.02 to 3.03) |   |             |                    |             |  |
| Maternal age             | .03       |                     | .35  |                     | .50  |                     | .82        |                     | .06 |                     |   |             |                    |             |  |
| 0.83 (0.69 to 0.98)      |           | 0.83 (0.69 to 0.98) |      | 0.92 (0.78 to 1.09) |      | 0.94 (0.78 to 1.13) |            | 0.98 (0.84 to 1.14) |     | 0.84 (0.71 to 1.00) |   |             |                    |             |  |
| Maternal education       | .03       |                     | .98  |                     | .42  |                     | .20        |                     | .24 |                     |   |             |                    |             |  |
| 0.83 (0.69 to 0.98)      |           | 0.83 (0.69 to 0.98) |      | 1.00 (0.74 to 1.34) |      | 0.88 (0.64 to 1.20) |            | 0.85 (0.65 to 1.09) |     | 1.20 (0.90 to 1.61) |   |             |                    |             |  |
| Maternal income          | .07       |                     | .15  |                     | .88  |                     | .62        |                     | .06 |                     |   |             |                    |             |  |
| 0.85 (0.71 to 1.01)      |           | 0.85 (0.71 to 1.01) |      | 0.88 (0.74 to 1.05) |      | 0.99 (0.82 to 1.18) |            | 1.04 (0.90 to 1.20) |     | 0.84 (0.71 to 1.01) |   |             |                    |             |  |
| Access to sanitation     | .29       |                     | .68  |                     | .19  |                     | .24        |                     | .13 |                     |   |             |                    |             |  |
| Indoor vs shared         |           | 1.25 (0.56 to 2.78) |      | 0.74 (0.36 to 1.49) |      | 0.56 (0.27 to 1.16) |            | 0.82 (0.41 to 1.67) |     | 1.43 (0.63 to 3.27) |   |             |                    |             |  |
| Private vs shared        |           | 1.62 (0.80 to 3.27) |      | 0.79 (0.43 to 1.44) |      | 0.58 (0.31 to 1.07) |            | 1.23 (0.68 to 2.22) |     | 1.76 (0.85 to 3.68) |   |             |                    |             |  |
| Electricity              | .98       |                     | .33  |                     | .77  |                     | .82        |                     | .29 |                     |   |             |                    |             |  |
| No vs yes                |           | 1.01 (0.68 to 1.49) |      | 1.22 (0.82 to 1.81) |      | 1.07 (0.69 to 1.65) |            | 1.04 (0.73 to 1.49) |     | 0.81 (0.54 to 1.20) |   |             |                    |             |  |
| Source of water          | .99       |                     | .11  |                     | .75  |                     | .60        |                     | .95 |                     |   |             |                    |             |  |
| Yard vs home             |           | 1.05 (0.63 to 1.74) |      | 1.08 (0.63 to 1.86) |      | 1.02 (0.58 to 1.78) |            | 1.55 (0.94 to 2.55) |     | 0.92 (0.57 to 1.51) |   |             |                    |             |  |
| Communal vs home         |           | 1.16 (0.55 to 2.44) |      | 2.34 (1.16 to 4.70) |      | 1.20 (0.53 to 2.71) |            | 1.80 (0.90 to 3.62) |     | 0.69 (0.31 to 1.53) |   |             |                    |             |  |
| Other vs home            |           | 1.30 (0.25 to 6.69) |      | 2.73 (0.63 to 11.8) |      | 3.17 (0.73 to 13.8) |            | 1.33 (0.26 to 6.82) |     | 0.50 (0.06 to 4.18) |   |             |                    |             |  |
| Cooking method           | .89       |                     | .52  |                     | .82  |                     | .32        |                     | .07 |                     |   |             |                    |             |  |
| Gas, electric vs wood    |           | 0.84 (0.55 to 1.30) |      | 0.72 (0.46 to 1.11) |      | 0.79 (0.49 to 1.27) |            | 0.79 (0.52 to 1.16) |     | 0.58 (0.38 to 0.89) |   |             |                    |             |  |
| Kerosene vs wood         |           | 0.76 (0.09 to 6.67) |      | 0.70 (0.08 to 6.16) |      | —                   |            | 2.66 (0.52 to 13.6) |     | 1.50 (0.27 to 8.48) |   |             |                    |             |  |
| None vs wood             |           | —                   |      | —                   |      | —                   |            | —                   |     | —                   |   |             |                    |             |  |

CI, confidence interval; OR, odds ratio; —, not applicable.

**SUPPLEMENTAL TABLE 12** Multivariate Predictors of Composite Adverse Bayley-III Outcomes (Low, Invalid, or at Risk) for All Children in the Tshipidi Study, Botswana 2010–2012

| Bayley-III               | Cognitive |                     | Gross Motor |                  | Fine Motor |                     | Expressive Language |             | Receptive Language |                     |
|--------------------------|-----------|---------------------|-------------|------------------|------------|---------------------|---------------------|-------------|--------------------|---------------------|
|                          | <i>P</i>  | OR (95% CI)         | <i>P</i>    | OR (95% CI)      | <i>P</i>   | OR (95% CI)         | <i>P</i>            | OR (95% CI) | <i>P</i>           | OR (95% CI)         |
| HIV exposure status      |           |                     |             |                  |            |                     | .05                 |             |                    |                     |
| HIV-exposed vs unexposed | —         |                     | —           |                  | —          |                     | 1.44 (1.01 to 2.06) |             | —                  |                     |
| Sex                      | .05       |                     |             |                  | <.01       |                     |                     |             | .09                |                     |
| Male vs female           |           | 1.50 (1.00 to 2.23) | —           |                  |            | 2.18 (1.38 to 3.44) | —                   |             |                    | 1.43 (0.95 to 2.14) |
| Birth weight             | .05       |                     | <.01        |                  |            |                     |                     |             |                    |                     |
| Low vs normal            |           | 1.74 (1.01 to 3.00) |             | 2.09 (1.23–3.56) | —          |                     | —                   |             | —                  |                     |
| Breastfed                |           |                     |             |                  |            |                     |                     |             |                    |                     |
| Ever vs never            | —         |                     | —           |                  | —          |                     | —                   |             | —                  |                     |
| Premature                |           |                     |             |                  | <.01       |                     |                     |             | .07                |                     |
| Premature vs term        | —         |                     | —           |                  |            | 2.60 (1.49 to 4.53) | —                   |             |                    | 1.68 (0.97 to 2.93) |
| Maternal age             | .03       |                     | —           |                  | —          |                     | —                   |             | .04                |                     |
|                          |           | 0.82 (0.68 to 0.98) | —           |                  | —          |                     | —                   |             |                    | 0.83 (0.69 to 0.99) |
| Cooking method           |           |                     |             |                  |            |                     |                     |             |                    |                     |
| Gas, electric vs wood    | —         |                     | —           |                  | —          |                     | —                   |             |                    | 0.58 (0.38 to 0.89) |
| Kerosene vs wood         | —         |                     | —           |                  | —          |                     | —                   |             |                    | 1.46 (0.25 to 8.50) |
| None vs wood             | —         |                     | —           |                  | —          |                     | —                   |             |                    | —                   |

CI, confidence interval; OR, odds ratio; —, not applicable.
